# Supplementary material
Source: PubMed Central journal article supplement (PMC6003595)
Supplement: NIHMS77794-supplement-Supplementary_Figures.pdf [file NIHMS77794-supplement-Supplementary_Figures.pdf]

**a** LIYGQDSAYQSIAHYRPISNVSR (Emd) + HexNAc2.Hex10

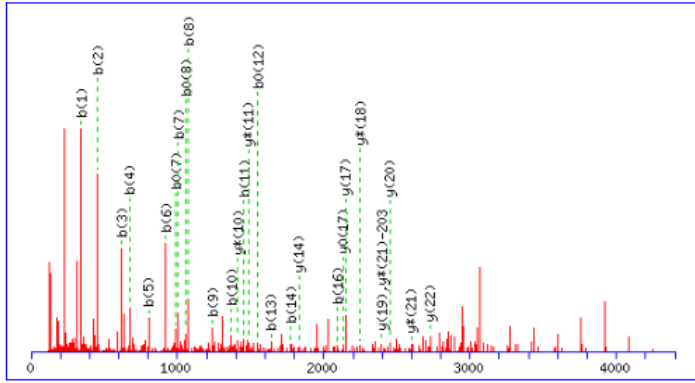

Monoisotopic mass of neutral peptide Mr(calc): 3069.57222  
 Fixed modifications: Methylthio (C)  
 Variable modifications:  
 N-term : TMT6plex (N-term)  
 S22 : HexNAc(NL) (NST), with neutral losses 0.00000 (shown in table), 203.07937  
 Ions Score: 65 Expect: 0.0013  
 Matches (Bold Red): 28/188 fragment ions using 71 most intense peaks

| #  | b          | b*         | b <sup>0</sup> | Seq. | y          | y*         | y <sup>0</sup> | #  |
|----|------------|------------|----------------|------|------------|------------|----------------|----|
| 1  | 343.25427  |            |                | L    |            |            |                | 23 |
| 2  | 456.33834  |            |                | I    | 2728.33254 | 2711.30599 | 2710.32197     | 22 |
| 3  | 619.40167  |            |                | Y    | 2615.24847 | 2598.22192 | 2597.23791     | 21 |
| 4  | 676.42313  |            |                | G    | 2452.18514 | 2435.15860 | 2434.17458     | 20 |
| 5  | 804.48171  | 787.45516  |                | Q    | 2395.16368 | 2378.13713 | 2377.15312     | 19 |
| 6  | 919.50865  | 902.48210  | 901.49809      | D    | 2267.10510 | 2250.07855 | 2249.09454     | 18 |
| 7  | 1006.54068 | 989.51413  | 988.53011      | S    | 2152.07816 | 2135.05161 | 2134.06759     | 17 |
| 8  | 1077.57779 | 1060.55124 | 1059.56723     | A    | 2065.04613 | 2048.01958 | 2047.03557     | 16 |
| 9  | 1240.64112 | 1223.61457 | 1222.63056     | Y    | 1994.00902 | 1976.98247 | 1975.99845     | 15 |
| 10 | 1368.69970 | 1351.67315 | 1350.68913     | Q    | 1830.94569 | 1813.91914 | 1812.93512     | 14 |
| 11 | 1455.73173 | 1438.70518 | 1437.72116     | S    | 1702.88711 | 1685.86056 | 1684.87655     | 13 |
| 12 | 1568.81579 | 1551.78924 | 1550.80523     | I    | 1615.85508 | 1598.82853 | 1597.84452     | 12 |
| 13 | 1639.85291 | 1622.82636 | 1621.84234     | A    | 1502.77102 | 1485.74447 | 1484.76045     | 11 |
| 14 | 1776.91182 | 1759.88527 | 1758.90125     | H    | 1431.73391 | 1414.70736 | 1413.72334     | 10 |
| 15 | 1939.97515 | 1922.94860 | 1921.96458     | Y    | 1294.67499 | 1277.64844 | 1276.66443     | 9  |
| 16 | 2096.07626 | 2079.04971 | 2078.06569     | R    | 1131.61166 | 1114.58512 | 1113.60110     | 8  |
| 17 | 2193.12902 | 2176.10247 | 2175.11846     | P    | 975.51055  | 958.48400  | 957.49999      | 7  |
| 18 | 2306.21309 | 2289.18654 | 2288.20252     | I    | 878.45779  | 861.43124  | 860.44722      | 6  |
| 19 | 2393.24511 | 2376.21856 | 2375.23455     | S    | 765.37373  | 748.34718  | 747.36316      | 5  |
| 20 | 2507.28804 | 2490.26149 | 2489.27748     | N    | 678.34170  | 661.31515  | 660.33113      | 4  |
| 21 | 2606.35645 | 2589.32991 | 2588.34589     | V    | 564.29877  | 547.27222  | 546.28821      | 3  |
| 22 | 2896.46786 | 2879.44131 | 2878.45729     | S    | 465.23036  | 448.20381  | 447.21979      | 2  |
| 23 |            |            |                | R    | 175.11895  | 158.09240  |                | 1  |

**b** LIYGQDSAYQSIAHYRPISNVSR (Emd), deamidated

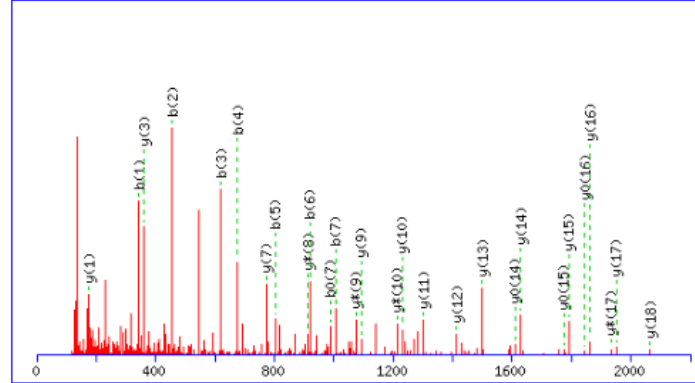

Monoisotopic mass of neutral peptide Mr(calc): 2867.47685  
 Fixed modifications: Methylthio (C), TMT6plex (N-term)  
 Variable modifications:  
 N20 : Deamidated (N)  
 Ions Score: 94 Expect: 6e-08  
 Matches (Bold Red): 28/122 fragment ions using 41 most intense peaks

| #  | b          | b*         | b <sup>0</sup> | Seq. | y          | y*         | y <sup>0</sup> | #  |
|----|------------|------------|----------------|------|------------|------------|----------------|----|
| 1  | 343.25427  |            |                | L    |            |            |                | 23 |
| 2  | 456.33834  |            |                | I    | 2526.23717 | 2509.21062 | 2508.22661     | 22 |
| 3  | 619.40166  |            |                | Y    | 2413.15311 | 2396.12656 | 2395.14254     | 21 |
| 4  | 676.42313  |            |                | G    | 2250.08978 | 2233.06323 | 2232.07921     | 20 |
| 5  | 804.48171  | 787.45516  |                | Q    | 2193.06831 | 2176.04176 | 2175.05775     | 19 |
| 6  | 919.50865  | 902.48210  | 901.49808      | D    | 2065.00974 | 2047.98319 | 2046.99917     | 18 |
| 7  | 1006.54068 | 989.51413  | 988.53011      | S    | 1949.98279 | 1932.95624 | 1931.97223     | 17 |
| 8  | 1077.57779 | 1060.55124 | 1059.56723     | A    | 1862.95076 | 1845.92422 | 1844.94020     | 16 |
| 9  | 1240.64112 | 1223.61457 | 1222.63056     | Y    | 1791.91365 | 1774.88710 | 1773.90309     | 15 |
| 10 | 1368.69970 | 1351.67315 | 1350.68913     | Q    | 1628.85032 | 1611.82377 | 1610.83976     | 14 |
| 11 | 1455.73173 | 1438.70518 | 1437.72116     | S    | 1500.79174 | 1483.76519 | 1482.78118     | 13 |
| 12 | 1568.81579 | 1551.78924 | 1550.80523     | I    | 1413.75972 | 1396.73317 | 1395.74915     | 12 |
| 13 | 1639.85291 | 1622.82636 | 1621.84234     | A    | 1300.67565 | 1283.64910 | 1282.66509     | 11 |
| 14 | 1776.91182 | 1759.88527 | 1758.90125     | H    | 1229.63854 | 1212.61199 | 1211.62797     | 10 |
| 15 | 1939.97515 | 1922.94860 | 1921.96458     | Y    | 1092.57963 | 1075.55308 | 1074.56906     | 9  |
| 16 | 2096.07626 | 2079.04971 | 2078.06569     | R    | 929.51630  | 912.48975  | 911.50573      | 8  |
| 17 | 2193.12902 | 2176.10247 | 2175.11846     | P    | 773.41519  | 756.38864  | 755.40462      | 7  |
| 18 | 2306.21309 | 2289.18654 | 2288.20252     | I    | 676.36242  | 659.33587  | 658.35186      | 6  |
| 19 | 2393.24511 | 2376.21856 | 2375.23455     | S    | 563.27836  | 546.25181  | 545.26779      | 5  |
| 20 | 2507.28804 | 2490.26149 | 2489.27748     | N    | 476.24633  | 459.21978  | 458.23576      | 4  |
| 21 | 2606.34046 | 2590.31391 | 2589.32990     | V    | 361.21939  | 344.19284  | 343.20883      | 3  |
| 22 | 2694.37249 | 2677.34594 | 2676.36193     | S    | 262.15098  | 245.12443  | 244.14042      | 2  |
| 23 |            |            |                | R    | 175.11895  | 158.09240  |                | 1  |

Supplementary Figure 1.

### **Supplementary Figure 1. Identification of Emerin (Emd) as N-glycoprotein.**

(a) N-Glycopeptide LIYGQDSAYQSIAHYRPISNVSR (Emd) with the glycan composition HexNAc2.Hex10 was identified with high confidence via MS/MS. (b) Analysis of the corresponding PNGaseF-treated HILIC fraction identified the non-glycosylated peptide LIYGQDSAYQSIAHYRPISNVSR bearing the enzymatically induced deamidation of formerly N-glycosylated asparagine residues at position 20. Of note, in the context of the amino-acid sequence, asparagine 20 is part of a potential N-glycosylation sequence-motive.

**a** FSEEPEVAANFTK (Nop56) + HexNAc2.Hex6

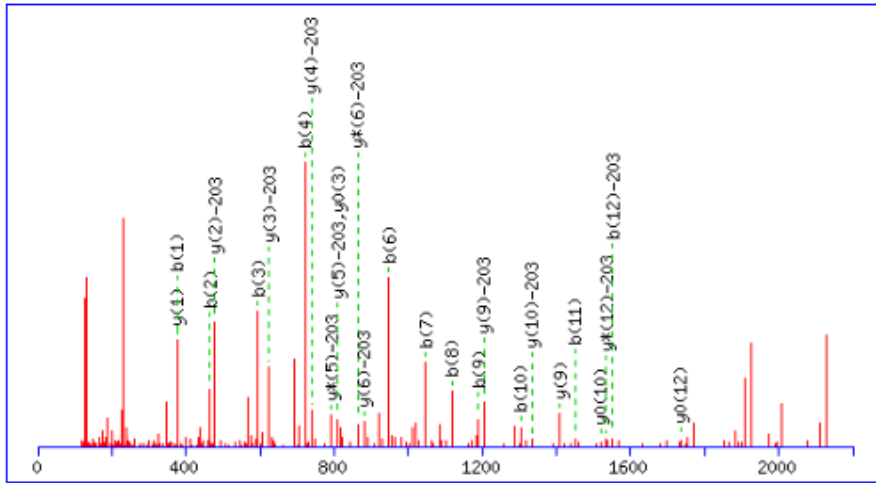

Monoisotopic mass of neutral peptide Mr(calc): 2129.09340  
 Fixed modifications: Methylthio (C)  
 Variable modifications:  
 N-term : TMT6plex (N-term)  
 T12 : HexNAc(NL) (NST), with neutral losses 203.07937(shown in table), 0.00000  
 K13 : TMT6plex (K)  
 Ions Score: 67 Expect: 0.0003  
 Matches (Bold Red): 26/97 fragment ions using 46 most intense peaks

| #  | b                 | b*         | b <sup>0</sup> | Seq. | y                 | y*                | y <sup>0</sup> | #  |
|----|-------------------|------------|----------------|------|-------------------|-------------------|----------------|----|
| 1  | <b>377.23862</b>  |            |                | F    |                   |                   |                | 13 |
| 2  | <b>464.27065</b>  |            | 446.26009      | S    | 1550.78997        | <b>1533.76342</b> | 1532.77941     | 12 |
| 3  | <b>593.31324</b>  |            | 575.30268      | E    | 1463.75795        | 1446.73140        | 1445.74738     | 11 |
| 4  | <b>722.35584</b>  |            | 704.34527      | E    | <b>1334.71535</b> | 1317.68880        | 1316.70479     | 10 |
| 5  | 819.40860         |            | 801.39804      | P    | <b>1205.67276</b> | 1188.64621        | 1187.66219     | 9  |
| 6  | <b>948.45119</b>  |            | 930.44063      | E    | 1108.62000        | 1091.59345        | 1090.60943     | 8  |
| 7  | <b>1047.51961</b> |            | 1029.50904     | V    | 979.57740         | 962.55085         | 961.56684      | 7  |
| 8  | <b>1118.55672</b> |            | 1100.54616     | A    | <b>880.50899</b>  | <b>863.48244</b>  | 862.49842      | 6  |
| 9  | <b>1189.59384</b> |            | 1171.58327     | A    | <b>809.47187</b>  | <b>792.44533</b>  | 791.46131      | 5  |
| 10 | <b>1303.63676</b> | 1286.61021 | 1285.62620     | N    | <b>738.43476</b>  | 721.40821         | 720.42420      | 4  |
| 11 | <b>1450.70518</b> | 1433.67863 | 1432.69461     | F    | <b>624.39183</b>  | 607.36528         | 606.38127      | 3  |
| 12 | <b>1551.75286</b> | 1534.72631 | 1533.74229     | T    | <b>477.32342</b>  | 460.29687         | 459.31285      | 2  |
| 13 |                   |            |                | K    | <b>376.27574</b>  | 359.24919         |                | 1  |

**b** FSEEPEVAANFTK (Nop56), deamidated

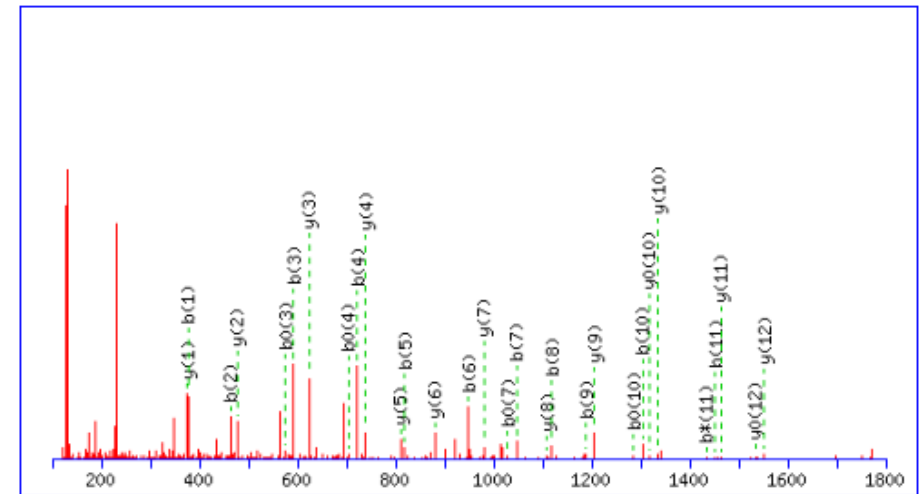

Monoisotopic mass of neutral peptide Mr(calc): 1926.99803  
 Fixed modifications: Methylthio (C), TMT6plex (N-term)  
 Variable modifications:  
 N10 : Deamidated (N)  
 K13 : TMT6plex (K)  
 Ions Score: 65 Expect: 3.6e-05  
 Matches (Bold Red): 30/61 fragment ions using 68 most intense peaks

| #  | b                 | b*                | b <sup>0</sup>    | Seq. | y                 | y*         | y <sup>0</sup>    | #  |
|----|-------------------|-------------------|-------------------|------|-------------------|------------|-------------------|----|
| 1  | <b>377.23862</b>  |                   |                   | F    |                   |            |                   | 13 |
| 2  | <b>464.27065</b>  |                   | 446.26009         | S    | <b>1551.77398</b> | 1534.74743 | <b>1533.76341</b> | 12 |
| 3  | <b>593.31324</b>  |                   | <b>575.30268</b>  | E    | <b>1464.74195</b> | 1447.71540 | 1446.73139        | 11 |
| 4  | <b>722.35584</b>  |                   | <b>704.34527</b>  | E    | <b>1335.69936</b> | 1318.67281 | <b>1317.68879</b> | 10 |
| 5  | <b>819.40860</b>  |                   | 801.39803         | P    | <b>1206.65677</b> | 1189.63022 | 1188.64620        | 9  |
| 6  | <b>948.45119</b>  |                   | 930.44063         | E    | <b>1109.60400</b> | 1092.57745 | 1091.59344        | 8  |
| 7  | <b>1047.51961</b> |                   | <b>1029.50904</b> | V    | <b>980.56141</b>  | 963.53486  | 962.55084         | 7  |
| 8  | <b>1118.55672</b> |                   | 1100.54616        | A    | <b>881.49299</b>  | 864.46645  | 863.48243         | 6  |
| 9  | <b>1189.59384</b> |                   | 1171.58327        | A    | <b>810.45588</b>  | 793.42933  | 792.44532         | 5  |
| 10 | <b>1304.62077</b> | 1287.59422        | <b>1286.61021</b> | N    | <b>739.41877</b>  | 722.39222  | 721.40820         | 4  |
| 11 | <b>1451.68919</b> | <b>1434.66264</b> | 1433.67862        | F    | <b>624.39183</b>  | 607.36528  | 606.38127         | 3  |
| 12 | 1552.73686        | 1535.71032        | 1534.72630        | T    | <b>477.32342</b>  | 460.29687  | 459.31285         | 2  |
| 13 |                   |                   |                   | K    | <b>376.27574</b>  | 359.24919  |                   | 1  |

## **Supplementary Figure 2. Identification of Nuclear protein 56 (Nop56) as N-glycoprotein.**

(a) N-Glycopeptide FSEEP EVAANFTK (Nop56) with the glycan composition HexNAc<sub>2</sub>.Hex<sub>6</sub> was identified with high confidence via MS/MS. (b) MS/MS data analysis of the corresponding PNGaseF-treated HILIC fraction identified the non-glycosylated peptide FSEEP EVAANFTK bearing the enzymatically induced deamidation of formerly N-glycosylated asparagine residues at position 10. Of note, in the context of the amino-acid sequence, asparagine 10 is part of a potential N-glycosylation sequence-motive.

**a** ASSNESLVANR (Tmpo) + HexNAc2.Hex11

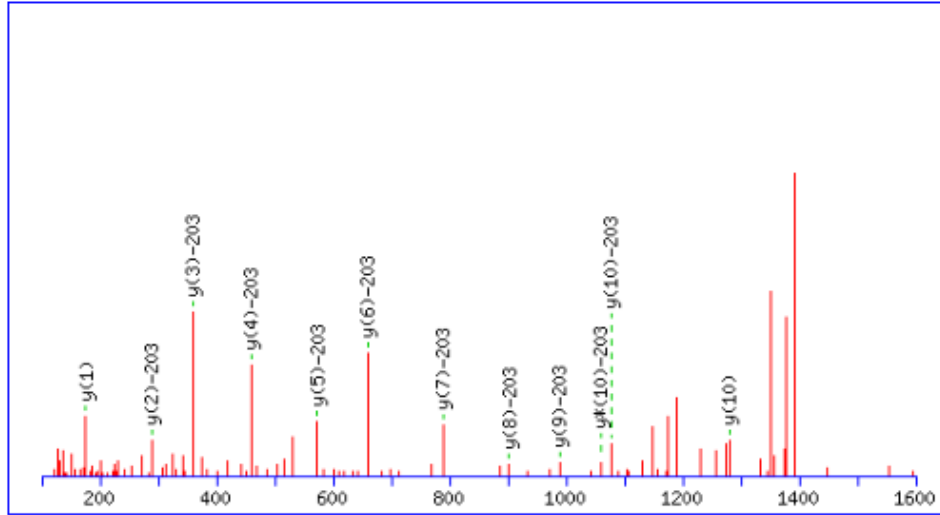

Monoisotopic mass of neutral peptide Mr(calc): 1349.64226  
 Fixed modifications: Methylthio (C)  
 Variable modifications:  
 N10 : HexNAc(NL) (NST), with neutral losses 203.07937 (shown in table), 0.00000  
 Ions Score: 102 Expect: 2.3e-08  
 Matches (**Bold Red**): 12/77 fragment ions using 21 most intense peaks

| #  | b         | b*        | b <sup>0</sup> | Seq. | y                 | y*                | y <sup>0</sup> | #  |
|----|-----------|-----------|----------------|------|-------------------|-------------------|----------------|----|
| 1  | 72.04439  |           |                | A    |                   |                   |                | 11 |
| 2  | 159.07642 |           | 141.06585      | S    | <b>1076.53308</b> | <b>1059.50653</b> | 1058.52251     | 10 |
| 3  | 246.10845 |           | 228.09788      | S    | <b>989.50105</b>  | 972.47450         | 971.49048      | 9  |
| 4  | 360.15137 | 343.12482 | 342.14081      | N    | <b>902.46902</b>  | 885.44247         | 884.45846      | 8  |
| 5  | 489.19397 | 472.16742 | 471.18340      | E    | <b>788.42609</b>  | 771.39955         | 770.41553      | 7  |
| 6  | 576.22599 | 559.19944 | 558.21543      | S    | <b>659.38350</b>  | 642.35695         | 641.37294      | 6  |
| 7  | 689.31006 | 672.28351 | 671.29949      | L    | <b>572.35147</b>  | 555.32492         |                | 5  |
| 8  | 788.37847 | 771.35192 | 770.36791      | V    | <b>459.26741</b>  | 442.24086         |                | 4  |
| 9  | 859.41559 | 842.38904 | 841.40502      | A    | <b>360.19900</b>  | 343.17245         |                | 3  |
| 10 | 973.45852 | 956.43197 | 955.44795      | N    | <b>289.16188</b>  | 272.13533         |                | 2  |
| 11 |           |           |                | R    | <b>175.11895</b>  | 158.09240         |                | 1  |

**b** ASSNESLVANR (Tmpo), deamidated

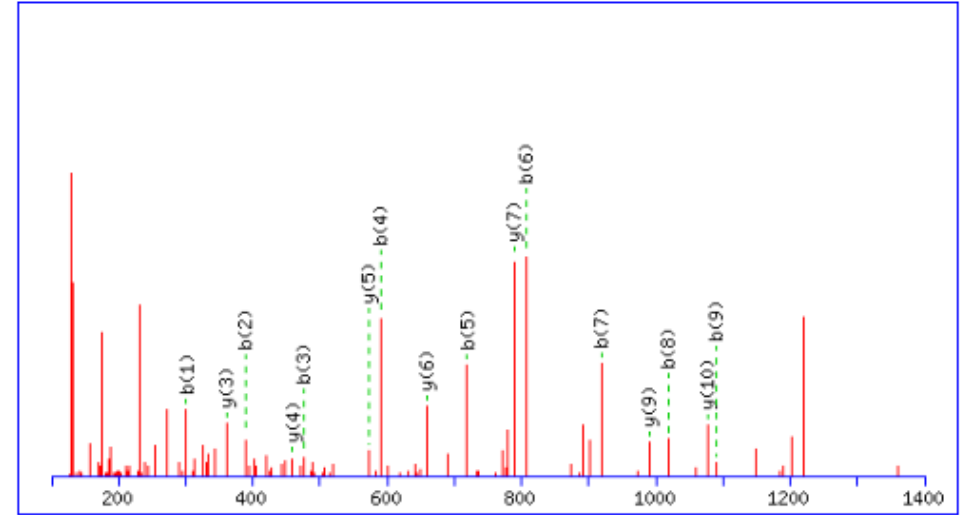

Monoisotopic mass of neutral peptide Mr(calc): 1376.70982  
 Fixed modifications: Methylthio (C), TMT6plex (N-term)  
 Variable modifications:  
 N4 : Deamidated (N)  
 Ions Score: 75 Expect: 2.1e-06  
 Matches (**Bold Red**): 16/51 fragment ions using 26 most intense peaks

| #  | b                 | b*         | b <sup>0</sup> | Seq. | y                 | y*         | y <sup>0</sup> | #  |
|----|-------------------|------------|----------------|------|-------------------|------------|----------------|----|
| 1  | <b>301.20732</b>  |            |                | A    |                   |            |                | 11 |
| 2  | <b>388.23935</b>  |            | 370.22879      | S    | <b>1077.51708</b> | 1060.49054 | 1059.50652     | 10 |
| 3  | <b>475.27138</b>  |            | 457.26081      | S    | <b>990.48506</b>  | 973.45851  | 972.47449      | 9  |
| 4  | <b>590.29831</b>  | 573.27176  | 572.28775      | N    | 903.45303         | 886.42648  | 885.44246      | 8  |
| 5  | <b>719.34091</b>  | 702.31436  | 701.33034      | E    | <b>788.42609</b>  | 771.39954  | 770.41553      | 7  |
| 6  | <b>806.37293</b>  | 789.34639  | 788.36237      | S    | <b>659.38350</b>  | 642.35695  | 641.37293      | 6  |
| 7  | <b>919.45700</b>  | 902.43045  | 901.44643      | L    | <b>572.35147</b>  | 555.32492  |                | 5  |
| 8  | <b>1018.52541</b> | 1001.49886 | 1000.51485     | V    | <b>459.26741</b>  | 442.24086  |                | 4  |
| 9  | <b>1089.56253</b> | 1072.53598 | 1071.55196     | A    | <b>360.19899</b>  | 343.17244  |                | 3  |
| 10 | 1203.60545        | 1186.57891 | 1185.59489     | N    | 289.16188         | 272.13533  |                | 2  |
| 11 |                   |            |                | R    | 175.11895         | 158.09240  |                | 1  |

### **Supplementary Figure 3. Identification of Lamina-associated polypeptide 2 (Tm<sub>po</sub>) as N-glycoprotein.**

(a) N-Glycopeptide ASSNESLVANR (Tm<sub>po</sub>) with the glycan composition HexNAc<sub>2</sub>.Hex<sub>11</sub> was identified with high confidence via MS/MS. (b) MS/MS data analysis of the corresponding PNGaseF-treated HILIC fraction identified the non-glycosylated peptide ASSNESLVANR bearing the enzymatically induced deamidation of formerly N-glycosylated asparagine residues at position 4. Of note, in the context of the amino-acid sequence, asparagine 4 is part of a potential N-glycosylation sequence-motive.

**a** NSSSNALAGTPAK (Rad51ap1) + HexNAc2.Hex12

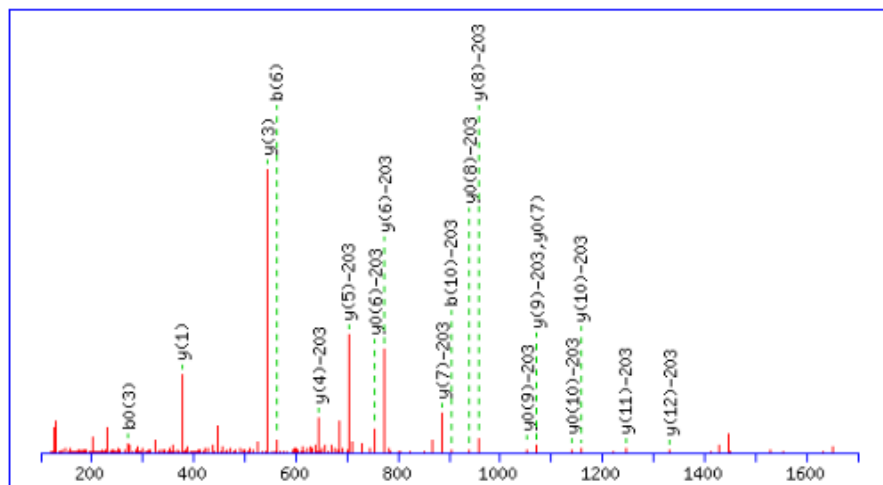

Monoisotopic mass of neutral peptide Mr(calc): 1648.84706  
 Fixed modifications: Methylthio (C)  
 Variable modifications:  
 T10 : HexNAc(NL) (NST), with neutral losses 203.07937(shown in table), 0.00000  
 K13 : TMT6plex (K)  
 Ions Score: 90 Expect: 8.2e-07  
 Matches (**Bold Red**): 19/104 fragment ions using 33 most intense peaks

| #  | b                | b*         | b <sup>0</sup>   | Seq. | y                 | y*         | y <sup>0</sup>    | #  |
|----|------------------|------------|------------------|------|-------------------|------------|-------------------|----|
| 1  | 115.05020        | 98.02365   |                  | N    |                   |            |                   | 13 |
| 2  | 202.08223        | 185.05568  | 184.07167        | S    | <b>1332.73206</b> | 1315.70552 | 1314.72150        | 12 |
| 3  | 289.11426        | 272.08771  | <b>271.10369</b> | S    | <b>1245.70004</b> | 1228.67349 | 1227.68947        | 11 |
| 4  | 376.14629        | 359.11974  | 358.13572        | S    | <b>1158.66801</b> | 1141.64146 | <b>1140.65744</b> | 10 |
| 5  | 490.18921        | 473.16267  | 472.17865        | N    | <b>1071.63598</b> | 1054.60943 | <b>1053.62542</b> | 9  |
| 6  | <b>561.22633</b> | 544.19978  | 543.21576        | A    | <b>957.59305</b>  | 940.56650  | <b>939.58249</b>  | 8  |
| 7  | 674.31039        | 657.28384  | 656.29983        | L    | <b>886.55594</b>  | 869.52939  | 868.54537         | 7  |
| 8  | 745.34751        | 728.32096  | 727.33694        | A    | <b>773.47188</b>  | 756.44533  | <b>755.46131</b>  | 6  |
| 9  | 802.36897        | 785.34242  | 784.35841        | G    | <b>702.43476</b>  | 685.40821  | 684.42420         | 5  |
| 10 | <b>903.41665</b> | 886.39010  | 885.40609        | T    | <b>645.41330</b>  | 628.38675  | 627.40273         | 4  |
| 11 | 1000.46942       | 983.44287  | 982.45885        | P    | <b>544.36562</b>  | 527.33907  |                   | 3  |
| 12 | 1071.50653       | 1054.47998 | 1053.49597       | A    | 447.31285         | 430.28630  |                   | 2  |
| 13 |                  |            |                  | K    | <b>376.27574</b>  | 359.24919  |                   | 1  |

**b** NSSSNALAGTPAK (Rad51ap1), deamidated

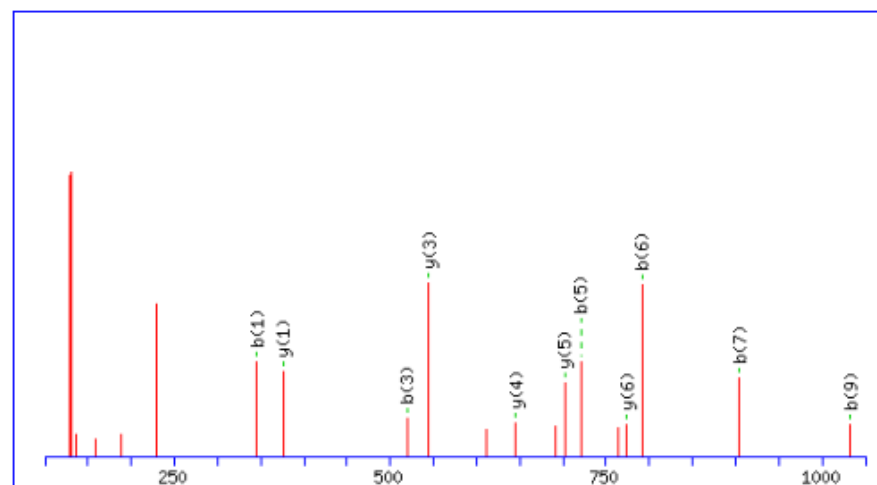

Monoisotopic mass of neutral peptide Mr(calc): 1675.91463  
 Fixed modifications: Methylthio (C), TMT6plex (N-term)  
 Variable modifications:  
 N1 : Deamidated (N)  
 K13 : TMT6plex (K)  
 Ions Score: 48 Expect: 0.0019  
 Matches (**Bold Red**): 11/68 fragment ions using 16 most intense peaks

| #  | b                 | b*         | b <sup>0</sup> | Seq. | y                | y*         | y <sup>0</sup> | #  |
|----|-------------------|------------|----------------|------|------------------|------------|----------------|----|
| 1  | <b>345.19714</b>  | 328.17059  |                | N    |                  |            |                | 13 |
| 2  | 432.22917         | 415.20262  | 414.21861      | S    | 1332.73206       | 1315.70551 | 1314.72150     | 12 |
| 3  | <b>519.26120</b>  | 502.23465  | 501.25064      | S    | 1245.70003       | 1228.67348 | 1227.68947     | 11 |
| 4  | 606.29323         | 589.26668  | 588.28266      | S    | 1158.66801       | 1141.64146 | 1140.65744     | 10 |
| 5  | <b>720.33616</b>  | 703.30961  | 702.32559      | N    | 1071.63598       | 1054.60943 | 1053.62541     | 9  |
| 6  | <b>791.37327</b>  | 774.34672  | 773.36270      | A    | 957.59305        | 940.56650  | 939.58249      | 8  |
| 7  | <b>904.45733</b>  | 887.43078  | 886.44677      | L    | 886.55594        | 869.52939  | 868.54537      | 7  |
| 8  | 975.49445         | 958.46790  | 957.48388      | A    | <b>773.47187</b> | 756.44532  | 755.46131      | 6  |
| 9  | <b>1032.51591</b> | 1015.48936 | 1014.50535     | G    | <b>702.43476</b> | 685.40821  | 684.42419      | 5  |
| 10 | 1133.56359        | 1116.53704 | 1115.55303     | T    | <b>645.41329</b> | 628.38675  | 627.40273      | 4  |
| 11 | 1230.61635        | 1213.58981 | 1212.60579     | P    | <b>544.36562</b> | 527.33907  |                | 3  |
| 12 | 1301.65347        | 1284.62692 | 1283.64290     | A    | 447.31285        | 430.28630  |                | 2  |
| 13 |                   |            |                | K    | <b>376.27574</b> | 359.24919  |                | 1  |

**Supplementary Figure 4. Identification of RAD51-associated protein 1 (Rad51ap1) as N-glycoprotein.**

(a) N-Glycopeptide NSSSNASLAGTPAK (Rad51ap1) with the glycan composition HexNAc2.Hex11 was identified with high confidence via MS/MS. (b) MS/MS data analysis of the corresponding PNGaseF-treated HILIC fraction identified the non-glycosylated peptide NSSSNASLAGTPAK bearing the enzymatically induced deamidation of formerly N-glycosylated asparagine residues at position 1. Of note, in the context of the amino-acid sequence, asparagine 1 is part of a potential N-glycosylation sequence-motive.



**a** NLTSSK (Smg7) + HexNAc2.Hex12

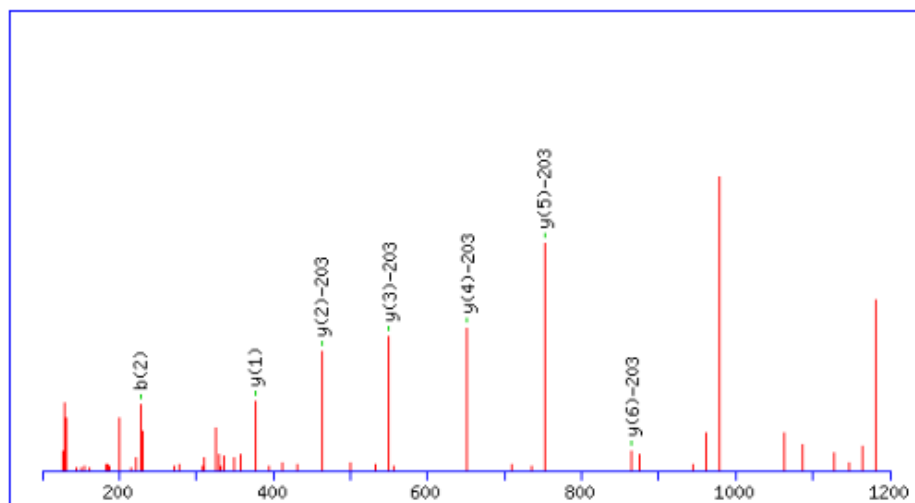

Monoisotopic mass of neutral peptide Mr(calc): 1181.63423  
 Fixed modifications: Methylthio (C)  
 Variable modifications:  
 S6 : HexNAc(NL) (NST), with neutral losses 203.07937(shown in table), 0.00000  
 K7 : TMT6plex (K)  
 Ions Score: 54 Expect: 0.0017  
 Matches (Bold Red): 7/51 fragment ions using 15 most intense peaks

| # | b                | b*        | b <sup>0</sup> | Seq. | y                | y*        | y <sup>0</sup> | # |
|---|------------------|-----------|----------------|------|------------------|-----------|----------------|---|
| 1 | 115.05020        | 98.02365  |                | N    |                  |           |                | 7 |
| 2 | <b>228.13427</b> | 211.10772 |                | L    | <b>865.51922</b> | 848.49267 | 847.50865      | 6 |
| 3 | 329.18195        | 312.15540 | 311.17138      | T    | <b>752.43515</b> | 735.40861 | 734.42459      | 5 |
| 4 | 430.22962        | 413.20308 | 412.21906      | T    | <b>651.38748</b> | 634.36093 | 633.37691      | 4 |
| 5 | 517.26165        | 500.23510 | 499.25109      | S    | <b>550.33980</b> | 533.31325 | 532.32923      | 3 |
| 6 | 604.29368        | 587.26713 | 586.28312      | S    | <b>463.30777</b> | 446.28122 | 445.29720      | 2 |
| 7 |                  |           |                | K    | <b>376.27574</b> | 359.24919 |                | 1 |

**b** NLTSSK (Smg7), deamidated

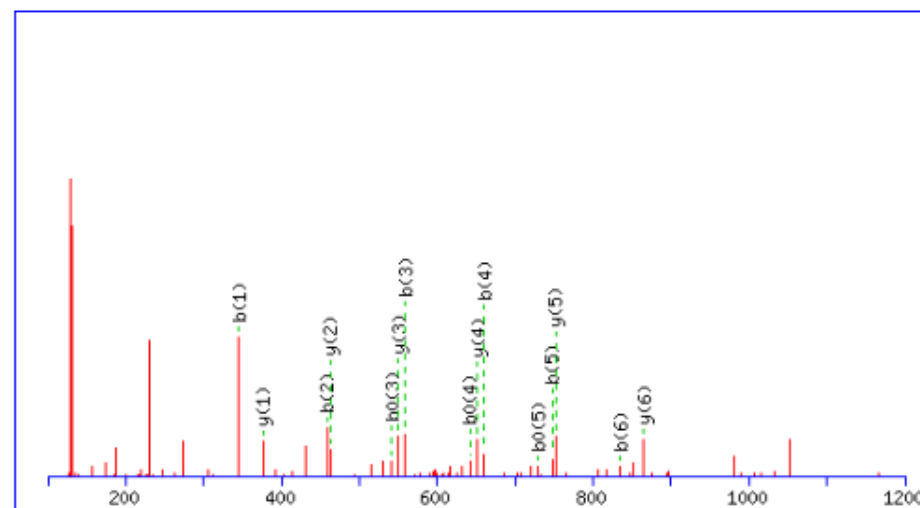

Monoisotopic mass of neutral peptide Mr(calc): 1208.70180  
 Fixed modifications: Methylthio (C),TMT6plex (N-term)  
 Variable modifications:  
 N1 : Deamidated (N)  
 K7 : TMT6plex (K)  
 Ions Score: 30 Expect: 0.061  
 Matches (Bold Red): 15/33 fragment ions using 30 most intense peaks

| # | b                | b*        | b <sup>0</sup>   | Seq. | y                | y*        | y <sup>0</sup> | # |
|---|------------------|-----------|------------------|------|------------------|-----------|----------------|---|
| 1 | <b>345.19714</b> | 328.17059 |                  | N    |                  |           |                | 7 |
| 2 | <b>458.28121</b> | 441.25466 |                  | L    | <b>865.51922</b> | 848.49267 | 847.50865      | 6 |
| 3 | <b>559.32889</b> | 542.30234 | <b>541.31832</b> | T    | <b>752.43515</b> | 735.40860 | 734.42459      | 5 |
| 4 | <b>660.37657</b> | 643.35002 | <b>642.36600</b> | T    | <b>651.38747</b> | 634.36092 | 633.37691      | 4 |
| 5 | <b>747.40859</b> | 730.38204 | <b>729.39803</b> | S    | <b>550.33979</b> | 533.31324 | 532.32923      | 3 |
| 6 | <b>834.44062</b> | 817.41407 | 816.43006        | S    | <b>463.30776</b> | 446.28122 | 445.29720      | 2 |
| 7 |                  |           |                  | K    | <b>376.27574</b> | 359.24919 |                | 1 |

### **Supplementary Figure 5. Identification of Smg7 as N-glycoprotein.**

(a) N-Glycopeptide NLTTSSK (Smg7) with the glycan composition HexNAc2.Hex12 was identified with high confidence via MS/MS.

(b) MS/MS data analysis of the corresponding PNGaseF-treated HILIC fraction identified the non-glycosylated peptide NLTTSSK bearing the enzymatically induced deamidation of formerly N-glycosylated asparagine residues at position 1. Of note, in the context of the amino-acid sequence, asparagine 1 is part of a potential N-glycosylation sequence-motive.

**a** LSYNTASNK (Rpl34) + HexNAc2.Hex12

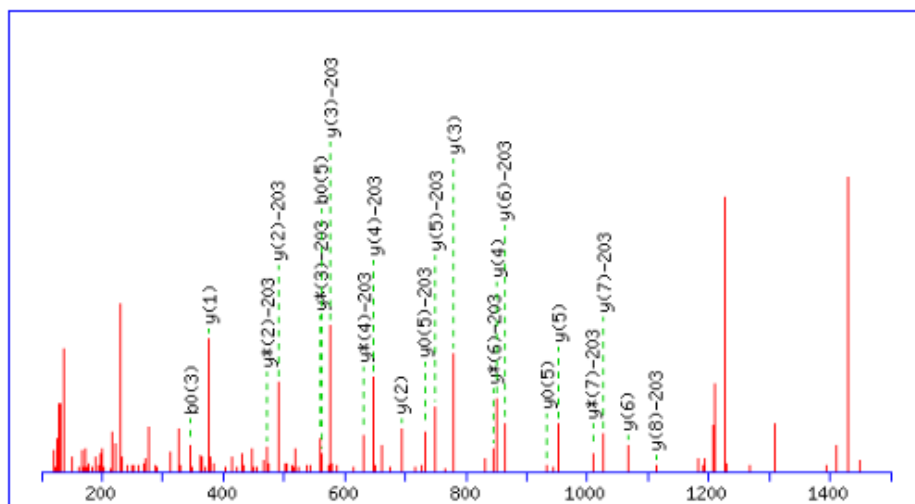

Monoisotopic mass of neutral peptide  $M_r(\text{calc})$ : 1428.72990

Fixed modifications: Methylthio (C)

Variable modifications:

N8 : HexNAc(NL) (NST), with neutral losses 203.07937(shown in table), 0.00000

K9 : TMT6plex (K)

Ions Score: 50 Expect: 0.0046

Matches (Bold Red): 22/65 fragment ions using 40 most intense peaks

| # | b         | b*        | b <sup>0</sup>   | Seq. | y                 | y*                | y <sup>0</sup>   | # |
|---|-----------|-----------|------------------|------|-------------------|-------------------|------------------|---|
| 1 | 114.09134 |           |                  | L    |                   |                   |                  | 9 |
| 2 | 201.12337 |           | 183.11280        | S    | <b>1113.57377</b> | 1096.54722        | 1095.56321       | 8 |
| 3 | 364.18670 |           | <b>346.17613</b> | Y    | <b>1026.54174</b> | <b>1009.51520</b> | 1008.53118       | 7 |
| 4 | 478.22962 | 461.20308 | 460.21906        | N    | <b>863.47841</b>  | <b>846.45187</b>  | 845.46785        | 6 |
| 5 | 579.27730 | 562.25075 | <b>561.26674</b> | T    | <b>749.43549</b>  | 732.40894         | <b>731.42492</b> | 5 |
| 6 | 650.31442 | 633.28787 | 632.30385        | A    | <b>648.38781</b>  | <b>631.36126</b>  | 630.37724        | 4 |
| 7 | 737.34645 | 720.31990 | 719.33588        | S    | <b>577.35070</b>  | <b>560.32415</b>  | 559.34013        | 3 |
| 8 | 851.38937 | 834.36283 | 833.37881        | N    | <b>490.31867</b>  | <b>473.29212</b>  |                  | 2 |
| 9 |           |           |                  | K    | <b>376.27574</b>  | 359.24919         |                  | 1 |

**b** LSYNTASNK (Rpl34), deamidated

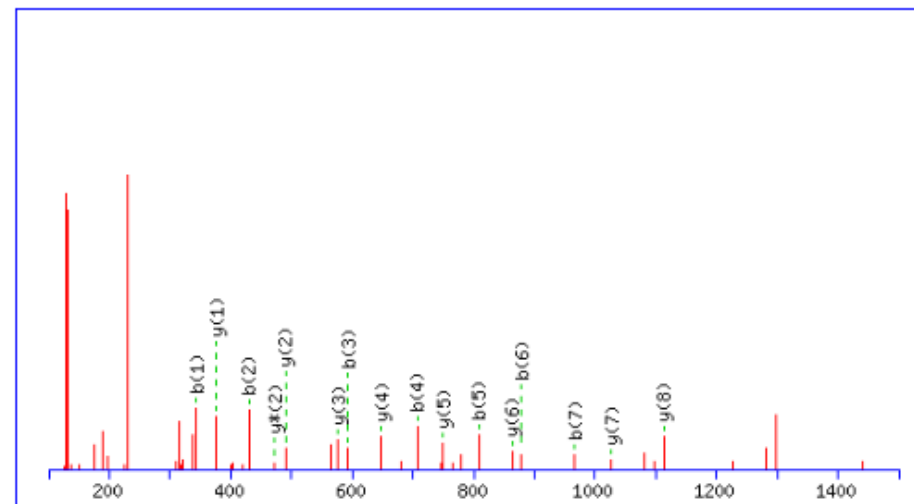

Monoisotopic mass of neutral peptide  $M_r(\text{calc})$ : 1454.81346

Fixed modifications: Methylthio (C), TMT6plex (N-term)

Variable modifications:

K9 : TMT6plex (K)

Ions Score: 43 Expect: 0.0042

Matches (Bold Red): 16/42 fragment ions using 34 most intense peaks

| # | b                | b*         | b <sup>0</sup> | Seq. | y                 | y*               | y <sup>0</sup> | # |
|---|------------------|------------|----------------|------|-------------------|------------------|----------------|---|
| 1 | <b>343.25427</b> |            |                | L    |                   |                  |                | 9 |
| 2 | <b>430.28630</b> |            | 412.27573      | S    | <b>1113.57377</b> | 1096.54722       | 1095.56320     | 8 |
| 3 | <b>593.34963</b> |            | 575.33906      | Y    | <b>1026.54174</b> | 1009.51519       | 1008.53118     | 7 |
| 4 | <b>707.39256</b> | 690.36601  | 689.38199      | N    | <b>863.47841</b>  | 846.45186        | 845.46785      | 6 |
| 5 | <b>808.44024</b> | 791.41369  | 790.42967      | T    | <b>749.43548</b>  | 732.40894        | 731.42492      | 5 |
| 6 | <b>879.47735</b> | 862.45080  | 861.46678      | A    | <b>648.38781</b>  | 631.36126        | 630.37724      | 4 |
| 7 | <b>966.50938</b> | 949.48283  | 948.49881      | S    | <b>577.35069</b>  | 560.32414        | 559.34013      | 3 |
| 8 | 1080.55230       | 1063.52576 | 1062.54174     | N    | <b>490.31866</b>  | <b>473.29211</b> |                | 2 |
| 9 |                  |            |                | K    | <b>376.27574</b>  | 359.24919        |                | 1 |

**Supplementary Figure 6. Identification of the 60S ribosomal protein L34 (Rpl34) as N-glycoprotein.**

(a) N-Glycopeptide LSYNTASNK (Rpl34) with the glycan composition HexNAc<sub>2</sub>.Hex<sub>12</sub> was identified with high confidence via MS/MS. (b) MS/MS data analysis of the corresponding PNGaseF-treated HILIC fraction identified the non-glycosylated peptide LSYNTASNK bearing the enzymatically induced deamidation of formerly N-glycosylated asparagine residues at position 8. Of note, in the context of the amino-acid sequence, asparagine 8 is part of a potential N-glycosylation sequence-motive.

**a** NSTSSIEPR (Map4k4) + HexNAc2.Hex12

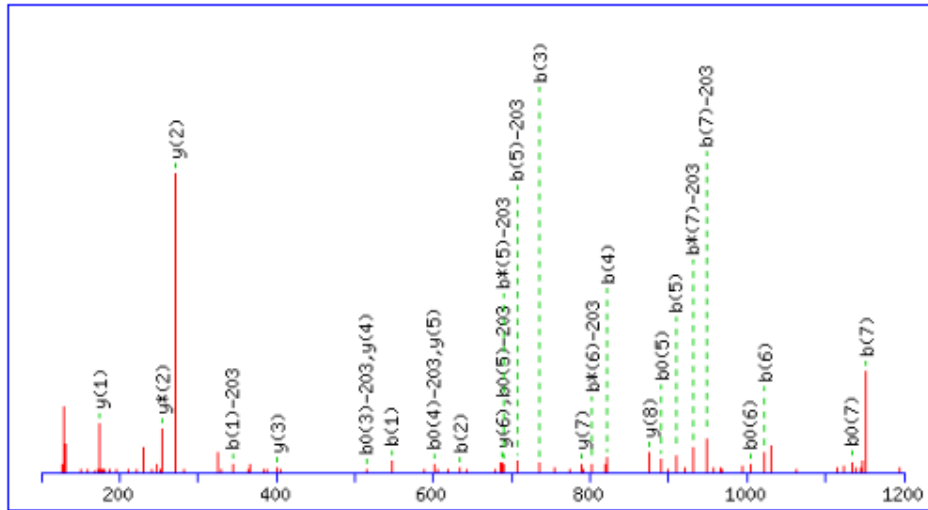

Monoisotopic mass of neutral peptide Mr(calc): 1421.72008

Fixed modifications: Methylthio (C)

Variable modifications:

N-term : TMT6plex (N-term)

N1 : HexNAc(NL) (NST), with neutral losses 203.07937(shown in table), 0.00000

Ions Score: 41 Expect: 0.051

Matches (Bold Red): 28/68 fragment ions using 52 most intense peaks

| # | b                | b*               | b <sup>0</sup>   | Seq. | y                | y*               | y <sup>0</sup> | # |
|---|------------------|------------------|------------------|------|------------------|------------------|----------------|---|
| 1 | <b>344.21314</b> | 327.18659        |                  | N    |                  |                  |                | 9 |
| 2 | 431.24517        | 414.21862        | 413.23460        | S    | <b>876.44214</b> | 859.41559        | 858.43157      | 8 |
| 3 | 532.29285        | 515.26630        | <b>514.28228</b> | T    | <b>789.41011</b> | 772.38356        | 771.39954      | 7 |
| 4 | 619.32487        | 602.29832        | <b>601.31431</b> | S    | <b>688.36243</b> | 671.33588        | 670.35186      | 6 |
| 5 | <b>706.35690</b> | <b>689.33035</b> | <b>688.34634</b> | S    | <b>601.33040</b> | 584.30385        | 583.31984      | 5 |
| 6 | 819.44097        | <b>802.41442</b> | 801.43040        | I    | <b>514.29837</b> | 497.27182        | 496.28781      | 4 |
| 7 | <b>948.48356</b> | <b>931.45701</b> | 930.47299        | E    | <b>401.21431</b> | 384.18776        | 383.20374      | 3 |
| 8 | 1045.53632       | 1028.50977       | 1027.52576       | P    | <b>272.17172</b> | <b>255.14517</b> |                | 2 |
| 9 |                  |                  |                  | R    | <b>175.11895</b> | 158.09240        |                | 1 |

**b** NSTSSIEPR (Map4k4), deamidated

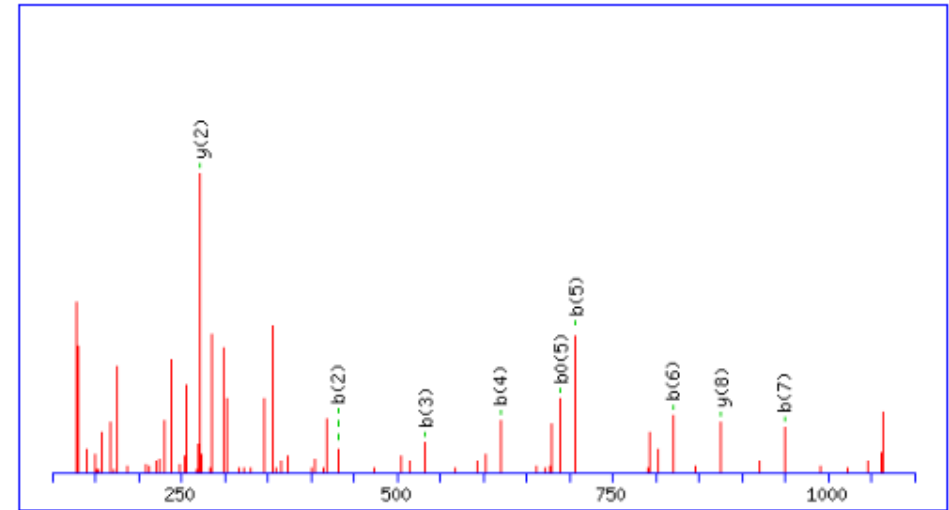

Monoisotopic mass of neutral peptide Mr(calc): 1219.62471

Fixed modifications: Methylthio (C),TMT6plex (N-term)

Variable modifications:

N1 : Deamidated (N)

Ions Score: 34 Expect: 0.02

Matches (Bold Red): 9/45 fragment ions using 13 most intense peaks

| # | b                | b*         | b <sup>0</sup>   | Seq. | y                | y*        | y <sup>0</sup> | # |
|---|------------------|------------|------------------|------|------------------|-----------|----------------|---|
| 1 | 345.19714        | 328.17059  |                  | N    |                  |           |                | 9 |
| 2 | <b>432.22917</b> | 415.20262  | 414.21861        | S    | <b>876.44214</b> | 859.41559 | 858.43157      | 8 |
| 3 | <b>533.27685</b> | 516.25030  | 515.26629        | T    | 789.41011        | 772.38356 | 771.39954      | 7 |
| 4 | <b>620.30888</b> | 603.28233  | 602.29831        | S    | 688.36243        | 671.33588 | 670.35186      | 6 |
| 5 | <b>707.34091</b> | 690.31436  | <b>689.33034</b> | S    | 601.33040        | 584.30385 | 583.31984      | 5 |
| 6 | <b>820.42497</b> | 803.39842  | 802.41441        | I    | 514.29837        | 497.27182 | 496.28781      | 4 |
| 7 | <b>949.46756</b> | 932.44101  | 931.45700        | E    | 401.21431        | 384.18776 | 383.20374      | 3 |
| 8 | 1046.52033       | 1029.49378 | 1028.50976       | P    | <b>272.17172</b> | 255.14517 |                | 2 |
| 9 |                  |            |                  | R    | 175.11895        | 158.09240 |                | 1 |

**Supplementary Figure 7. Identification of Mitogen-activated protein kinase kinase kinase kinase 4 (M4K4) as N-glycoprotein.**

(a) The N-Glycopeptide NSTSSIEPR (M4K4) with the glycan composition HexNAc<sub>2</sub>.Hex<sub>12</sub> was identified with high confidence via MS/MS. (b) Analysis of the corresponding PNGaseF-treated HILIC fraction identified the non-glycosylated peptide NSTSSIEPR bearing the enzymatically induced deamidation of formerly N-glycosylated asparagine residues at position 1. Of note, in the context of the amino-acid sequence, asparagine 1 is part of a potential N-glycosylation sequence-motive.

**a** SPNDSEAWHQK (Pbxip1) + HexNAc2.Hex8

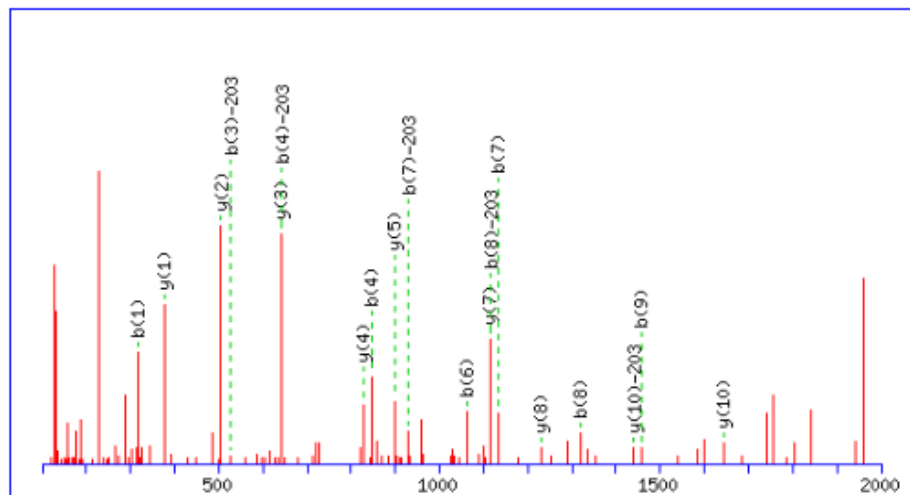

Monoisotopic mass of neutral peptide Mr(calc): 1958.97395

Fixed modifications: Methylthio (C)

Variable modifications:

N-term : TMT6plex (N-term)

N3 : HexNAc(NL) (NST), with neutral losses 203.07937(shown in table), 0.00000

K11 : TMT6plex (K)

Ions Score: 31 Expect: 0.87

Matches (Bold Red): 19/83 fragment ions using 50 most intense peaks

| #  | b                 | b*         | b <sup>0</sup> | Seq. | y                 | y*         | y <sup>0</sup> | #         |
|----|-------------------|------------|----------------|------|-------------------|------------|----------------|-----------|
| 1  | <b>317.20224</b>  |            | 299.19167      | S    |                   |            |                | <b>11</b> |
| 2  | 414.25500         |            | 396.24444      | P    | <b>1440.70691</b> | 1423.68036 | 1422.69635     | <b>10</b> |
| 3  | <b>528.29793</b>  | 511.27138  | 510.28737      | N    | 1343.65415        | 1326.62760 | 1325.64358     | <b>9</b>  |
| 4  | <b>643.32487</b>  | 626.29832  | 625.31431      | D    | <b>1229.61122</b> | 1212.58467 | 1211.60065     | <b>8</b>  |
| 5  | 730.35690         | 713.33035  | 712.34634      | S    | <b>1114.58427</b> | 1097.55773 | 1096.57371     | <b>7</b>  |
| 6  | 859.39950         | 842.37295  | 841.38893      | E    | 1027.55225        | 1010.52570 | 1009.54168     | <b>6</b>  |
| 7  | <b>930.43661</b>  | 913.41006  | 912.42604      | A    | <b>898.50965</b>  | 881.48311  |                | <b>5</b>  |
| 8  | <b>1116.51592</b> | 1099.48937 | 1098.50536     | W    | <b>827.47254</b>  | 810.44599  |                | <b>4</b>  |
| 9  | 1253.57483        | 1236.54829 | 1235.56427     | H    | <b>641.39323</b>  | 624.36668  |                | <b>3</b>  |
| 10 | 1381.63341        | 1364.60686 | 1363.62285     | Q    | <b>504.33431</b>  | 487.30777  |                | <b>2</b>  |
| 11 |                   |            |                | K    | <b>376.27574</b>  | 359.24919  |                | <b>1</b>  |

**b** SPNDSEAWHQK (Pbxip1), deamidated

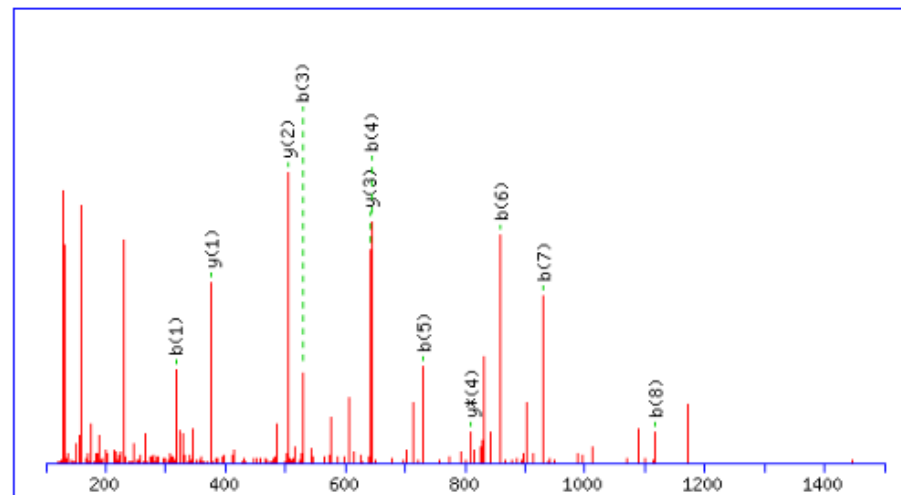

Monoisotopic mass of neutral peptide Mr(calc): 1756.87859

Fixed modifications: Methylthio (C),TMT6plex (N-term)

Variable modifications:

N3 : Deamidated (N)

K11 : TMT6plex (K)

Ions Score: 37 Expect: 0.014

Matches (Bold Red): 11/53 fragment ions using 22 most intense peaks

| #  | b                 | b*         | b <sup>0</sup> | Seq. | y                | y*               | y <sup>0</sup> | #         |
|----|-------------------|------------|----------------|------|------------------|------------------|----------------|-----------|
| 1  | <b>317.20224</b>  |            | 299.19167      | S    |                  |                  |                | <b>11</b> |
| 2  | 414.25500         |            | 396.24443      | P    | 1441.69092       | 1424.66437       | 1423.68035     | <b>10</b> |
| 3  | <b>529.28194</b>  | 512.25539  | 511.27137      | N    | 1344.63815       | 1327.61161       | 1326.62759     | <b>9</b>  |
| 4  | <b>644.30888</b>  | 627.28233  | 626.29831      | D    | 1229.61122       | 1212.58467       | 1211.60065     | <b>8</b>  |
| 5  | <b>731.34091</b>  | 714.31436  | 713.33034      | S    | 1114.58427       | 1097.55773       | 1096.57371     | <b>7</b>  |
| 6  | <b>860.38350</b>  | 843.35695  | 842.37293      | E    | 1027.55225       | 1010.52570       | 1009.54168     | <b>6</b>  |
| 7  | <b>931.42061</b>  | 914.39406  | 913.41005      | A    | 898.50965        | 881.48311        |                | <b>5</b>  |
| 8  | <b>1117.49993</b> | 1100.47338 | 1099.48936     | W    | 827.47254        | <b>810.44599</b> |                | <b>4</b>  |
| 9  | 1254.55884        | 1237.53229 | 1236.54827     | H    | <b>641.39323</b> | 624.36668        |                | <b>3</b>  |
| 10 | 1382.61742        | 1365.59087 | 1364.60685     | Q    | <b>504.33431</b> | 487.30777        |                | <b>2</b>  |
| 11 |                   |            |                | K    | <b>376.27574</b> | 359.24919        |                | <b>1</b>  |

**Supplementary Figure 8. Identification of pre-B-cell leukemia transcription factor-interacting protein 1 (Pbxip1) as N-glycoprotein.**

(a) N-Glycopeptide SPNDSEAWHQK (Pbxip1) with the glycan composition HexNAc<sub>2</sub>.Hex<sub>8</sub> was identified with high confidence via MS/MS. (b) MS/MS data analysis of the corresponding PNGaseF-treated HILIC fraction identified the non-glycosylated peptide SPNDSEAWHQK bearing the enzymatically induced deamidation of formerly N-glycosylated asparagine residues at position 3. Of note, asparagine 3 is part of a potential N-glycosylation sequence-motive.
